# Supplementary material
Source: PubMed Central journal article supplement (PMC3008576)
Supplement: NIHMS224092-supplement-1_si_001.pdf [file NIHMS224092-supplement-1_si_001.pdf]

**Supplementary Table 1 – SNO-proteins displaying SILAC ratio (L/H) > 0.65**

| <b>Primary Protein Name</b> | <b>Accession number</b> | <b>Protein Description</b>                              | <b>L/H ratio</b> |
|-----------------------------|-------------------------|---------------------------------------------------------|------------------|
| STIP1_HUMAN                 | P31948                  | Stress-induced-phosphoprotein 1                         | 0.67±0.03        |
| CDC37_HUMAN                 | Q16543                  | Hsp90 co-chaperone Cdc37                                | 0.67±0.06        |
| HS105_HUMAN                 | Q92598                  | Heat shock protein 105 kDa                              | 0.68±0.18        |
| TCPA_HUMAN                  | P17987                  | T-complex protein 1 subunit alpha                       | 0.68±0.05        |
| CPZIP_HUMAN                 | Q6JBY9                  | Capz-interacting protein                                | 0.68±0.18        |
| ACLY_HUMAN                  | P53396                  | ATP-citrate synthase                                    | 0.70±0.14        |
| FLNA_HUMAN                  | P21333                  | Filamin-A                                               | 0.70±0.03        |
| IMB1_HUMAN                  | Q14974                  | Importin subunit beta-1                                 | 0.70±0.08        |
| TEBP_HUMAN                  | Q15185                  | Prostaglandin E synthase 3                              | 0.71±0.03        |
| 1433Z_HUMAN                 | P63104                  | 14-3-3 protein zeta/delta                               | 0.71±0.03        |
| NSUN2_HUMAN                 | Q08J23                  | tRNA (cytosine-5-)-methyltransferase NSUN2              | 0.72±0.20        |
| PUR2_HUMAN                  | P22102                  | Trifunctional purine biosynthetic protein adenosine-3   | 0.73±0.09        |
| ANXA6_HUMAN                 | P08133                  | Annexin A6                                              | 0.73±0.05        |
| CHRD1_HUMAN                 | Q9UHD1                  | Cysteine and histidine-rich domain-containing protein 1 | 0.74±0.09        |
| GSTP1_HUMAN                 | P09211                  | Glutathione S-transferase P                             | 0.74±0.02        |
| PYRG1_HUMAN                 | P17812                  | CTP synthase 1                                          | 0.75±0.01        |
| HS90A_HUMAN                 | P07900                  | Heat shock protein HSP 90-alpha                         | 0.75±0.02        |
| ACPH_HUMAN                  | P13798                  | Acylamino-acid-releasing enzyme                         | 0.75±0.16        |
| UBA1_HUMAN                  | P22314                  | Ubiquitin-like modifier-activating enzyme 1             | 0.76±0.01        |
| EF2_HUMAN                   | P13639                  | Elongation factor 2                                     | 0.76±0.09        |
| AHSA1_HUMAN                 | O95433                  | Activator of 90 kDa heat shock protein ATPase homolog 1 | 0.77±0.15        |
| SYLC_HUMAN                  | Q9P2J5                  | Leucyl-tRNA synthetase, cytoplasmic                     | 0.77±0.10        |
| FLNB_HUMAN                  | O75369                  | Filamin-B                                               | 0.78±0.01        |
| ACTG_HUMAN                  | P63261                  | Actin, cytoplasmic 2                                    | 0.78±0.14        |
| RBBP7_HUMAN                 | Q16576                  | Histone-binding protein RBBP7                           | 0.78±0.02        |
| CAPG_HUMAN                  | P40121                  | Macrophage-capping protein                              | 0.79±0.02        |
| CNDP2_HUMAN                 | Q96KP4                  | Cytosolic non-specific dipeptidase                      | 0.80±0.29        |
| ACTN1_HUMAN                 | P12814                  | Alpha-actinin-1                                         | 0.80±0.10        |
| TCPQ_HUMAN                  | P50990                  | T-complex protein 1 subunit theta                       | 0.80±0.13        |
| TPM3_HUMAN                  | P06753                  | Tropomyosin alpha-3 chain                               | 0.80±0.10        |
| PUR4_HUMAN                  | O15067                  | Phosphoribosylformylglycinamide synthase                | 0.80±0.20        |
| HS90B_HUMAN                 | P08238                  | Heat shock protein HSP 90-beta                          | 0.81±0.08        |
| SRP09_HUMAN                 | P49458                  | Signal recognition particle 9 kDa protein               | 0.83±0.40        |
| PARK7_HUMAN                 | Q99497                  | Protein DJ-1                                            | 0.84±0.26        |

|             |        |                                                      |           |
|-------------|--------|------------------------------------------------------|-----------|
| GUAA_HUMAN  | P49915 | GMP synthase [glutamine-hydrolyzing]                 | 0.84±0.15 |
| TCPE_HUMAN  | P48643 | T-complex protein 1 subunit epsilon                  | 0.84±0.06 |
| TCPZ_HUMAN  | P40227 | T-complex protein 1 subunit zeta                     | 0.85±0.05 |
| TCPD_HUMAN  | P50991 | T-complex protein 1 subunit delta                    | 0.87±0.17 |
| SAHH_HUMAN  | P23526 | Adenosylhomocysteinase                               | 0.88±0.16 |
| BACH_HUMAN  | O00154 | Cytosolic acyl coenzyme A thioester hydrolase        | 0.90±0.13 |
| TLN1_HUMAN  | Q9Y490 | Talin-1                                              | 0.91±0.06 |
| TCPG_HUMAN  | P49368 | T-complex protein 1 subunit gamma                    | 0.91±0.06 |
| LDHA_HUMAN  | P00338 | L-lactate dehydrogenase A chain                      | 0.92±0.21 |
| TPM4_HUMAN  | P67936 | Tropomyosin alpha-4 chain                            | 0.92±0.21 |
| CYBP_HUMAN  | Q9HB71 | Calcyclin-binding protein                            | 0.92±0.20 |
| COTL1_HUMAN | Q14019 | Coactosin-like protein                               | 0.93±0.30 |
| PRDX1_HUMAN | Q06830 | Peroxiredoxin-1                                      | 0.94±0.17 |
| SYEP_HUMAN  | P07814 | Bifunctional aminoacyl-tRNA synthetase               | 0.94±0.31 |
| PCBP1_HUMAN | Q15365 | Poly(rC)-binding protein 1                           | 0.95±0.31 |
| SYTC_HUMAN  | P26639 | Threonyl-tRNA synthetase, cytoplasmic                | 0.95±0.08 |
| LDHB_HUMAN  | P07195 | L-lactate dehydrogenase B chain                      | 0.97±0.20 |
| EIF3H_HUMAN | O15372 | Eukaryotic translation initiation factor 3 subunit H | 0.97±0.27 |
| ALDOA_HUMAN | P04075 | Fructose-bisphosphate aldolase A                     | 0.97±0.13 |
| HSP7C_HUMAN | P11142 | Heat shock cognate 71 kDa protein                    | 0.97±0.16 |
| PGK1_HUMAN  | P00558 | Phosphoglycerate kinase 1                            | 0.98±0.22 |
| TPIS_HUMAN  | P60174 | Triosephosphate isomerase                            | 1.00±0.23 |
| PROF1_HUMAN | P07737 | Profilin-1                                           | 1.02±0.19 |
| PUR9_HUMAN  | P31939 | Bifunctional purine biosynthesis protein PURH        | 1.02±0.18 |
| G3P_HUMAN   | P04406 | Glyceraldehyde-3-phosphate dehydrogenase             | 1.02±0.21 |
| MIF_HUMAN   | P14174 | Macrophage migration inhibitory factor               | 1.03±0.10 |
| PCNA_HUMAN  | P12004 | Proliferating cell nuclear antigen                   | 1.06±0.07 |
| MOES_HUMAN  | P26038 | Moesin                                               | 1.07±0.27 |
| KU70_HUMAN  | P12956 | ATP-dependent DNA helicase 2 subunit 1               | 1.10±0.19 |
| AATC_HUMAN  | P17174 | Aspartate aminotransferase, cytoplasmic              | 1.10±0.05 |
| CAZA1_HUMAN | P52907 | F-actin-capping protein subunit alpha-1              | 1.11±0.18 |
| EVL_HUMAN   | Q9UI08 | Ena/VASP-like protein                                | 1.11±0.06 |
| TERA_HUMAN  | P55072 | Transitional endoplasmic reticulum ATPase            | 1.11±0.15 |
| WDR1_HUMAN  | O75083 | WD repeat-containing protein 1                       | 1.14±0.13 |
| PSMD2_HUMAN | Q13200 | 26S proteasome non-ATPase regulatory subunit 2       | 1.14±0.22 |
| KU86_HUMAN  | P13010 | ATP-dependent DNA helicase 2 subunit 2               | 1.15±0.08 |
| RAN_HUMAN   | P62826 | GTP-binding nuclear protein Ran                      | 1.15±0.42 |
| ADA_HUMAN   | P00813 | Adenosine deaminase                                  | 1.15±0.31 |

|             |        |                                                 |           |
|-------------|--------|-------------------------------------------------|-----------|
| PGAM1_HUMAN | P18669 | Phosphoglycerate mutase 1                       | 1.15±0.05 |
| C1TC_HUMAN  | P11586 | C-1-tetrahydrofolate synthase, cytoplasmic      | 1.16±0.12 |
| EF1A3_HUMAN | Q5VTE0 | Elongation factor 1-alpha 1                     | 1.16±0.03 |
| TIF1B_HUMAN | Q13263 | Transcription intermediary factor 1-beta        | 1.16±0.09 |
| CAP1_HUMAN  | Q01518 | Adenylyl cyclase-associated protein 1           | 1.17±0.23 |
| BOLA2_HUMAN | Q9H3K6 | BolA-like protein 2 - Homo sapiens              | 1.20±0.22 |
| MCM5_HUMAN  | P33992 | Heterogeneous nuclear ribonucleoprotein D0      | 1.20±0.25 |
| TKT_HUMAN   | P29401 | Transketolase                                   | 1.21±0.34 |
| KPYM_HUMAN  | P14618 | Pyruvate kinase isozymes M1/M2                  | 1.21±0.08 |
| TCPH_HUMAN  | Q99832 | T-complex protein 1 subunit eta                 | 1.22±0.19 |
| SEPT7_HUMAN | Q16181 | Septin-7                                        | 1.23±0.50 |
| GDIR2_HUMAN | P52566 | Rho GDP-dissociation inhibitor 2                | 1.24±0.31 |
| COR1A_HUMAN | P31146 | Coronin-1A                                      | 1.25±0.01 |
| HNRPU_HUMAN | Q00839 | Heterogeneous nuclear ribonucleoprotein U       | 1.27±0.01 |
| LASP1_HUMAN | Q14847 | LIM and SH3 domain protein 1                    | 1.28±0.30 |
| CDC42_HUMAN | P60953 | Cell division control protein 42 homolog        | 1.30±0.10 |
| SERC_HUMAN  | Q9Y617 | Phosphoserine aminotransferase                  | 1.35±0.02 |
| TBB2C_HUMAN | P68371 | Tubulin beta-2C chain                           | 1.35±0.18 |
| TBB5_HUMAN  | P07437 | Tubulin beta chain                              | 1.38±0.22 |
| ESTD_HUMAN  | P10768 | S-formylglutathione hydrolase                   | 1.38±0.14 |
| RL24_HUMAN  | P83731 | 60S ribosomal protein L24                       | 1.40±0.32 |
| TBA1B_HUMAN | P68363 | Tubulin alpha-1B chain                          | 1.44±0.22 |
| VAT1_HUMAN  | Q9953  | Synaptic vesicle membrane protein VAT-1 homolog | 1.47±0.38 |
| CNBP_HUMAN  | P62633 | Cellular nucleic acid-binding protein           | 1.57±0.51 |
| RAC2_HUMAN  | P15153 | Ras-related C3 botulinum toxin substrate 2      | 1.68±0.04 |
| SYNC_HUMAN  | O43776 | Asparaginyl-tRNA synthetase, cytoplasmic        | 1.75±0.77 |
| K6PP_HUMAN  | Q01813 | 6-phosphofructokinase type C                    | 5.2±1.2   |

---
